# Supplementary material
Source: Springer Nature journal article supplement (https://www.springermedizin.de/resource/supplementary/12911_2011_447_MOESM2_ESM.pdf/9525766)
Supplement: MOESM2 [file 9525766]

| <b>Screening tests</b>    | <b>Counseling services</b> | <b>Immunizations</b> |
|---------------------------|----------------------------|----------------------|
| Colorectal cancer         | Aspirin prophylaxis        | Pneumococcal         |
| Cervical cancer           | Smoking cessation          | Influenza            |
| Breast cancer             | Healthy diet               | Tetanus              |
| Prostate cancer           | Physical activity          |                      |
| Diabetes                  | Weight loss                |                      |
| Hypertension              |                            |                      |
| Hyperlipidemia            |                            |                      |
| Abdominal aortic aneurysm |                            |                      |
| Osteoporosis              |                            |                      |
| Chlamydia infection       |                            |                      |
